# Supplementary material for: Analysis of the Effects of Epidural Anesthesia on the Nociception Level Index (NOL®) during Abdominal Surgery
Source: Preprints.org preprint supplement (doi:10.20944/preprints202407.2055.v1), 2024-07-26
Supplement: Supplementary file 1 [file supplementary]

## Sheet: NOL
	Bupivcain	NOL 0min	NOL 1 min	NOL 3 min	NOL 5min		Lidocain	NOL 0min	NOL 1 min	NOL 3 min	NOL 5min		Ropivacain	NOL 0min	NOL 1 min	NOL 3 min	NOL 5min
PDK		22	33	17	1			32	26	16	4			28	2	12	52
		13	1	1	1			21	29	6	13			7	3	0	10
		2	32	20	46			44	55	44	26			58	16	50	35
		46		29	12			27	16	12	6			15	22	2	8
		9	11	2	14			38	58	19	17			23	10	14	13
		11	12	2	22			44	19	18	18
		22	4	1	26
		36	30	10	1
		5	16	4	10
		23	6	13	1
		15	26	3	0			34.3333	33.8333	19.1667	14			26.2	10.6	15.6	23.6
		18	42	5	4
		5	19	16	23
		15	8	3	1
		10	2	23	20
		15	16	11	14
		20	16	4	1
		27	30	25	28
		3	7	29	26
		0	6	24	20
		62	33	21	3
		2	9	10	4
		13	4	3	3
		0	0	1	1
		7	4	7	1
		2	3	1	1
		15	24	1	4
		1	3	8	9
		8	16	2	6
		29	22	6	22
		17	19	31
		5	3	3	2
		10	6	4	1
		1	0	1	18
		41	20	31	8
		22	32	13
		7	18	2	6
		14	6	4	3
		20	21	1	2
		22	21	1	1
		19	18	17	18
		1	0	1	0
		14	2	1	10
		18	4	35	28
		14	12	20	21
		34	17	17	19
		12	8	1	1
		19	27	18	21
		20	12	1	7
		25	18	8	20
		24	26	51	20
		16	6	20	12
		9	12	10	13
		12	22	6	17
		2	8	5	1
		13	0	2	0
		28	26	24	11
		2	3	17	17
		26	8	37	30
		13	7	7	8
		3	3	7	1
		52	57	44	27
		8	8	5	16
		14	2	18	16
		1	3	17	1
		11	45	53	8
		15	2	6
		6	12	10	8
		11	4	7	8
		39	21	22	3
		35	16	10	5
		13	8	30	1
		40	15	41	24
		23	9	25	11
		18	21	2	3
		16.3333	14.0946	13.1733	10.7222

## Sheet: NOL statistik
	Dosis	NOL 0min	NOL 1 min	NOL 3 min	NOL 5min		NOL 0min	NOL 1 min	NOL 3 min	NOL 5min		Lidocain	NOL 0min	NOL 1 min	NOL 3 min	NOL 5min		NOL 0min	NOL 1 min	NOL 3 min	NOL 5min		Ropivacain	NOL 0min	NOL 1 min	NOL 3 min	NOL 5min		NOL 0min	NOL 1 min	NOL 3 min	NOL 5min
PDK	12.5	62	33	21	3		100	53.2258	33.871	4.83871			32	26	16	4		100	81.25	50	12.5			28	2	12	52		100	7.14286	42.8571	185.714
	12.5	52	57	44	27		100	109.615	84.6154	51.9231			21	29	6	13		100	138.095	28.5714	61.9048			7	3	0	10		100	42.8571	0	142.857
	12.5	46		29	12		100	-	63.0435	26.087			44	55	44	26		100	125	100	59.0909			58	16	50	35		100	27.5862	86.2069	60.3448
	12.5	41	20	31	8		100	48.7805	75.6098	19.5122			27	16	12	6		100	59.2593	44.4444	22.2222			15	22	2	8		100	146.667	13.3333	53.3333
	12.5	40	15	41	24		100	37.5	102.5	60			38	58	19	17		100	152.632	50	44.7368			23	10	14	13		100	43.4783	60.8696	56.5217
	25	39	21	22	3		100	53.8462	56.4103	7.69231			9	2	1	0		100	22.2222	11.1111	0
	12.5	36	30	10	1		100	83.3333	27.7778	2.77778			44	19	18	18		100	43.1818	40.9091	40.9091
	12.5	35	16	10	5		100	45.7143	28.5714	14.2857
	12.5	34	17	17	19		100	50	50	55.8824
	12.5	29	22	6	22		100	75.8621	20.6897	75.8621
	12.5	28	26	24	11		100	92.8571	85.7143	39.2857			28.5	29.2857	16.5714	12		100	88.8057	46.4337	34.4805			26.2	10.6	15.6	23.6		100	53.5462	40.6534	99.7543
	12.5	27	30	25	28		100	111.111	92.5926	103.704			11.4127	20	13.7437	8.75595	#DIV/0!	5.80156e-15	46.2417	27.2654	23.3751								0	48.403	31.2658	54.4501
	12.5	26	8	37	30		100	30.7692	142.308	115.385
	12.5	25	18	8	20		100	72	32	80
	12.5	24	26	51	20		100	108.333	212.5	83.3333
	12.5	23	6	13	1		100	26.087	56.5217	4.34783
	12.5	23	9	25	11		100	39.1304	108.696	47.8261
	12.5	22	33	17	1		100	150	77.2727	4.54545
	12.5	22	4	1	26		100	18.1818	4.54545	118.182
	12.5	22	32	13			100	145.455	59.0909	0
	12.5	22	21	1	1		100	95.4545	4.54545	4.54545
	12.5	20	16	4	1		100	80	20	5
	12.5	20	21	1	2		100	105	5	10
	12.5	20	12	1	7		100	60	5	35
		19	18	17	18		100	94.7368	89.4737	94.7368
		19	27	18	21		100	142.105	94.7368	110.526
		18	42	5	4		100	233.333	27.7778	22.2222
		18	4	35	28		100	22.2222	194.444	155.556
		18	21	2	3		100	116.667	11.1111	16.6667
		17	19	31			100	111.765	182.353	0
		16	6	20	12		100	37.5	125	75
		15	26	3	0		100	173.333	20	0
		15	8	3	1		100	53.3333	20	6.66667
		15	16	11	14		100	106.667	73.3333	93.3333
		15	24	1	4		100	160	6.66667	26.6667
		15	2	6			100	13.3333	40	0
		14	6	4	3		100	42.8571	28.5714	21.4286
		14	2	1	10		100	14.2857	7.14286	71.4286
		14	12	20	21		100	85.7143	142.857	150
		14	2	18	16		100	14.2857	128.571	114.286
		13	1	1	1		100	7.69231	7.69231	7.69231
		13	4	3	3		100	30.7692	23.0769	23.0769
		13	0	2	0		100	0	15.3846	0
		13	7	7	8		100	53.8462	53.8462	61.5385
		13	8	30	1		100	61.5385	230.769	7.69231
		12	8	1	1		100	66.6667	8.33333	8.33333
		12	22	6	17		100	183.333	50	141.667
		11	12	2	22		100	109.091	18.1818	200
		11	45	53	8		100	409.091	481.818	72.7273
		11	4	7	8	#DIV/0!	100	36.3636	63.6364	72.7273
		10	2	23	20		100	20	230	200
		10	6	4	1		100	60	40	10
	12.5	33	27	21	13		100	81.8182	63.6364	39.3939
	12.5	20	16	13	6		100	80	65	30
	12.5	18	11	8	1		100	61.1111	44.4444	5.55556
	12.5	12	8	5	1		100	66.6667	41.6667	8.33333
							#DIV/0!	#DIV/0!	#DIV/0!	#DIV/0!
		21.7679	16.5273	14.875	10.3585

## Sheet: HF
	NOL 0min	NOL 1 min	NOL 3 min	NOL 5min		NOL 0min	NOL 1 min	NOL 3 min	NOL 5min
	84	83	80	81		100	98.8095	95.2381	96.4286
	79	81	77	78		100	102.532	97.4684	98.7342
	53	60	63	59		100	113.208	118.868	111.321
	60	58	60	64		100	96.6667	100	106.667
	65	67	67	68		100	103.077	103.077	104.615
	47	41	42	40		100	87.234	89.3617	85.1064
	56	55	56	77		100	98.2143	100	137.5
	76	77	75	70		100	101.316	98.6842	92.1053
	76	78	78	77		100	102.632	102.632	101.316
	92	89	87	79		100	96.7391	94.5652	85.8696
	84	84	77	74		100	100	91.6667	88.0952
	84	81	81	81		100	96.4286	96.4286	96.4286
	62	64	57	56		100	103.226	91.9355	90.3226
	86	85	85	87		100	98.8372	98.8372	101.163
	83	83	83	84		100	100	100	101.205
	90	87	95	90		100	96.6667	105.556	100
	78	95	78	88		100	121.795	100	112.821
	65	65	58	64		100	100	89.2308	98.4615
	65	64	64	66		100	98.4615	98.4615	101.538
	71	73	75	75		100	102.817	105.634	105.634
	47	45	50	51		100	95.7447	106.383	108.511
	64	57	52	57		100	89.0625	81.25	89.0625
	64	61	63	63		100	95.3125	98.4375	98.4375
	68	69	68	69		100	101.471	100	101.471
	66	66	66	68		100	100	100	103.03
	96	95	97	86		100	98.9583	101.042	89.5833
	90	91	93	92		100	101.111	103.333	102.222
	66	67	67	67		100	101.515	101.515	101.515
	62	63	61	61		100	101.613	98.3871	98.3871
	57	57	57	57		100	100	100	100
	60	58	61	59		100	96.6667	101.667	98.3333
	43	44	43	42		100	102.326	100	97.6744
	47	46	43	57		100	97.8723	91.4894	121.277
	50	50	49	51		100	100	98	102
	63	62	61	59		100	98.4127	96.8254	93.6508
	91	87	86	88		100	95.6044	94.5055	96.7033
	65	65	66	65		100	100	101.538	100
	70	63	63	64		100	90	90	91.4286
	52	53	53	56		100	101.923	101.923	107.692
	79	77	76	75		100	97.4684	96.2025	94.9367
	63	64	62	63		100	101.587	98.4127	100
	68	66	68	69		100	97.0588	100	101.471
	69	68	68	67		100	98.5507	98.5507	97.1014
	46	46	45	47		100	100	97.8261	102.174
	55	55	57	69		100	100	103.636	125.455
	66	65	65	65		100	98.4848	98.4848	98.4848
	61	60	58	57		100	98.3607	95.082	93.4426
	57	57	59	56		100	100	103.509	98.2456
	64	64	64	63		100	100	100	98.4375
	59	57	59	58		100	96.6102	100	98.3051
	57	53	59	57		100	92.9825	103.509	100
	87	91	90	100		100	104.598	103.448	114.943
	95	95	96	93		100	100	101.053	97.8947
	95	99	100	102		100	104.211	105.263	107.368
	44	48	46	45		100	109.091	104.545	102.273
	72	73	70	67		100	101.389	97.2222	93.0556
	38	44	40	37		100	115.789	105.263	97.3684
	52	53	51	45		100	101.923	98.0769	86.5385
	53	51	51	50		100	96.2264	96.2264	94.3396
	73	73	72	70		100	100	98.6301	95.8904
	64	62	74	78		100	96.875	115.625	121.875
	83	84	84	84		100	101.205	101.205	101.205
	54	55	54	51		100	101.852	100	94.4444
	89	90	88	88		100	101.124	98.8764	98.8764
	68	67	66	67		100	98.5294	97.0588	98.5294
	65	69	64	62		100	106.154	98.4615	95.3846
	66	69	67	68		100	104.545	101.515	103.03
	64	65	65	70		100	101.562	101.562	109.375
	68	69	66	67		100	101.471	97.0588	98.5294
	66	67	73	70		100	101.515	110.606	106.061
	59	59	59			100	100	100	0
	59	58	58	55		100	98.3051	98.3051	93.2203
	66	66	68	72		100	100	103.03	109.091
	65	60	60	61		100	92.3077	92.3077	93.8462
	75	74	74	78		100	98.6667	98.6667	104
	67.2133	67.2267	66.84	67.5135

## Sheet: MAD
	NOL 0min	NOL 1 min	NOL 3 min	NOL 5min		NOL 0min	NOL 1 min	NOL 3 min	NOL 5min
	128	126	108	102		100	98.4375	84.375	79.6875
	104	102	92	88		100	98.0769	88.4615	84.6154
	62	78	91	89		100	125.806	146.774	143.548
	88	84	80	74		100	95.4545	90.9091	84.0909
	88	87	84	81		100	98.8636	95.4545	92.0455
	70	70	67	65		100	100	95.7143	92.8571
	125	120	89	113		100	96	71.2	90.4
	105	110	96	88		100	104.762	91.4286	83.8095
	80	83	87	83		100	103.75	108.75	103.75
	84	81	93	104		100	96.4286	110.714	123.81
	82	91	87	102		100	110.976	106.098	124.39
	73	74	81	78		100	101.37	110.959	106.849
	68	78	82	86		100	114.706	120.588	126.471
	72	78	82	96		100	108.333	113.889	133.333
	104	106	92	86		100	101.923	88.4615	82.6923
	85	83	88	96		100	97.6471	103.529	112.941
	90	89	84	76		100	98.8889	93.3333	84.4444
	105	96	98	85		100	91.4286	93.3333	80.9524
	81	84	84	89		100	103.704	103.704	109.877
	93	89	90	83		100	95.6989	96.7742	89.2473
	86	90	91	89		100	104.651	105.814	103.488
	107	60	57	60		100	56.0748	53.271	56.0748
	92	86	61	44		100	93.4783	66.3043	47.8261
	80	82	81	80		100	102.5	101.25	100
	86	87	87	91		100	101.163	101.163	105.814
	88	87	90	90		100	98.8636	102.273	102.273
	66	64	66	73		100	96.9697	100	110.606
	68	65	63	60		100	95.5882	92.6471	88.2353
	56	57	59	55		100	101.786	105.357	98.2143
	70	74	80	76		100	105.714	114.286	108.571
	78	76	83	77		100	97.4359	106.41	98.7179
	80	81	80	81		100	101.25	100	101.25
	85	80	85	73		100	94.1176	100	85.8824
	74	76	80	75		100	102.703	108.108	101.351
	83	82	81	80		100	98.7952	97.5904	96.3855
	68	69	70	72		100	101.471	102.941	105.882
	90	84	75	67		100	93.3333	83.3333	74.4444
	113	116	119	115		100	102.655	105.31	101.77
	96	100	103	102		100	104.167	107.292	106.25
	97	97	92	95		100	100	94.8454	97.9381
	90	99	92	89		100	110	102.222	98.8889
	82	83	83	82		100	101.22	101.22	100
	105	103	106	106		100	98.0952	100.952	100.952
	80	81	82	81		100	101.25	102.5	101.25
	71	73	72	71		100	102.817	101.408	100
	84	79	71	60		100	94.0476	84.5238	71.4286
	78	83	91	90		100	106.41	116.667	115.385
	71	67	63	66		100	94.3662	88.7324	92.9577
	68	65	63	67		100	95.5882	92.6471	98.5294
	80	85	78	69		100	106.25	97.5	86.25
	95	95	94	95		100	100	98.9474	100
	96	105	91	82		100	109.375	94.7917	85.4167
	72	65	61	68		100	90.2778	84.7222	94.4444
	93	84	107	107		100	90.3226	115.054	115.054
	57	67	90	92		100	117.544	157.895	161.404
	68	63	70	83		100	92.6471	102.941	122.059
	93	94	90	90		100	101.075	96.7742	96.7742
	78	85	90	85		100	108.974	115.385	108.974
	84	87	87	87		100	103.571	103.571	103.571
	86	86	86	86		100	100	100	100
	81	79	79	79		100	97.5309	97.5309	97.5309
	78	79	78	78		100	101.282	100	100
	69	69	69	74		100	100	100	107.246
	83	87	83	73		100	104.819	100	87.9518
	127	127	116	102		100	100	91.3386	80.315
	100	99	100	99		100	99	100	99
	106	100	97	83		100	94.3396	91.5094	78.3019
	79	77	77	72		100	97.4684	97.4684	91.1392
	77	77	75	74		100	100	97.4026	96.1039
	79	80	90	82		100	101.266	113.924	103.797
	71	70	70	70		100	98.5915	98.5915	98.5915
	75	77	78	75		100	102.667	104	100
						#DIV/0!	#DIV/0!	#DIV/0!	#DIV/0!
	84.8056	84.6111	83.8472	82.4444		100	99.7707	98.87	97.2159
						#DIV/0!	#DIV/0!	#DIV/0!	#DIV/0!

## Sheet: BIS
	NOL 0min	NOL 1 min	NOL 3 min	NOL 5min		NOL 0min	NOL 1 min	NOL 3 min	NOL 5min
	42	42	40	40		100	100	95.2381	95.2381
	40	40	42	41		100	100	105	102.5
	45	43	40	41		100	95.5556	88.8889	91.1111
	40	39	41	43		100	97.5	102.5	107.5
	58	46	45	44		100	79.3103	77.5862	75.8621
	53	49	43	41		100	92.4528	81.1321	77.3585
	46	46	48	44		100	100	104.348	95.6522
	58	56	56	50		100	96.5517	96.5517	86.2069
	44	50	55	50		100	113.636	125	113.636
	52	55	48	63		100	105.769	92.3077	121.154
	54	51	48	57		100	94.4444	88.8889	105.556
	50	59	56	56		100	118	112	112
	41	42	50	55		100	102.439	121.951	134.146
	57	54	44	55		100	94.7368	77.193	96.4912
	43	40	44	49		100	93.0233	102.326	113.953
	53	46	44	44		100	86.7925	83.0189	83.0189
	47	52	50	49		100	110.638	106.383	104.255
	51	58	47	51		100	113.725	92.1569	100
	48	48	49	50		100	100	102.083	104.167
	46	41	38	39		100	89.1304	82.6087	84.7826
	37	33	35	44		100	89.1892	94.5946	118.919
	40	43	36	36		100	107.5	90	90
	25	38	35	32		100	152	140	128
	30	36	32	37		100	120	106.667	123.333
	34	37	46	40		100	108.824	135.294	117.647
	34	41	40	37		100	120.588	117.647	108.824
	44	46	40	45		100	104.545	90.9091	102.273
	50	54	61	51		100	108	122	102
	44	39	44	45		100	88.6364	100	102.273
	35	44	36	36		100	125.714	102.857	102.857
	39	42	34	40		100	107.692	87.1795	102.564
	42	38	43	40		100	90.4762	102.381	95.2381
	42	40	48	60		100	95.2381	114.286	142.857
	33	31	31	31		100	93.9394	93.9394	93.9394
	31	31	34	32		100	100	109.677	103.226
	28	29	36	44		100	103.571	128.571	157.143
	61	48	48	51		100	78.6885	78.6885	83.6066
	71	50	64	63		100	70.4225	90.1408	88.7324
	77	78	74	78		100	101.299	96.1039	101.299
	47	39	34	31		100	82.9787	72.3404	65.9574
	45	49	44	41		100	108.889	97.7778	91.1111
	34	32	40	42		100	94.1176	117.647	123.529
	44	47	53	44		100	106.818	120.455	100
	20	23	25	26		100	115	125	130
	56	58	57	59		100	103.571	101.786	105.357
	56	54	53	51		100	96.4286	94.6429	91.0714
	52	51	52	53		100	98.0769	100	101.923
	53	51	52	57		100	96.2264	98.1132	107.547
	41	39	36	37		100	95.122	87.8049	90.2439
	25	38	38	35		100	152	152	140
	41	41	41	40		100	100	100	97.561
	40	39	39	39		100	97.5	97.5	97.5
	59	54	57	62		100	91.5254	96.6102	105.085
	49	41	41	40		100	83.6735	83.6735	81.6327
	30	38	34	34		100	126.667	113.333	113.333
	35	32	31	30		100	91.4286	88.5714	85.7143
	36	39	37	34		100	108.333	102.778	94.4444
	42	42	44	40		100	100	104.762	95.2381
	47	50	51	50		100	106.383	108.511	106.383
	30	32	34	41		100	106.667	113.333	136.667
	50	51	49	48		100	102	98	96
	42	40	42	40		100	95.2381	100	95.2381
	42	37	49	33		100	88.0952	116.667	78.5714
	40	43	47	54		100	107.5	117.5	135
	51	52	51	45		100	101.961	100	88.2353
	51	52	53	52		100	101.961	103.922	101.961
	29	29	31			100	100	106.897	0
	31	27	27	29		100	87.0968	87.0968	93.5484
	34	29	25	27		100	85.2941	73.5294	79.4118
	38	42	39	43		100	110.526	102.632	113.158
	35	38	33	34		100	108.571	94.2857	97.1429
